# Supplementary material
Source: PubMed Central journal article supplement (PMC2759836)
Supplement: supp_M900122-JLR200_Supp2.pdf [file supp_M900122-JLR200_Supp2.pdf]

**Supplementary Figure I.** Dose dependent effects of SQ and DQ on ABCA1 expression and apoA-I-dependent cellular lipid release in cultured cells (**A, B**). \*  $p < 0.05$  and \*\*  $P < 0.01$  from apoA-I (+) control. The increase of ABCA1 protein was significant from control (apoA-I (-)) ( $p < 0.05$ ) after digital scanning and standardization for  $\beta$ -actin. mRNA of ABCA1 was standardized for GAPDH/ $\beta$ -actin (**C**).

## A THP-1

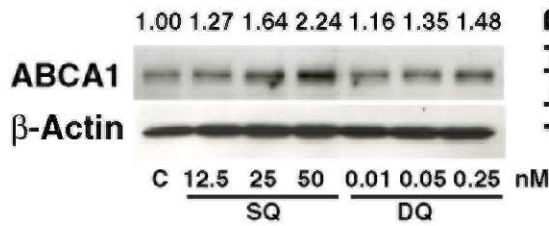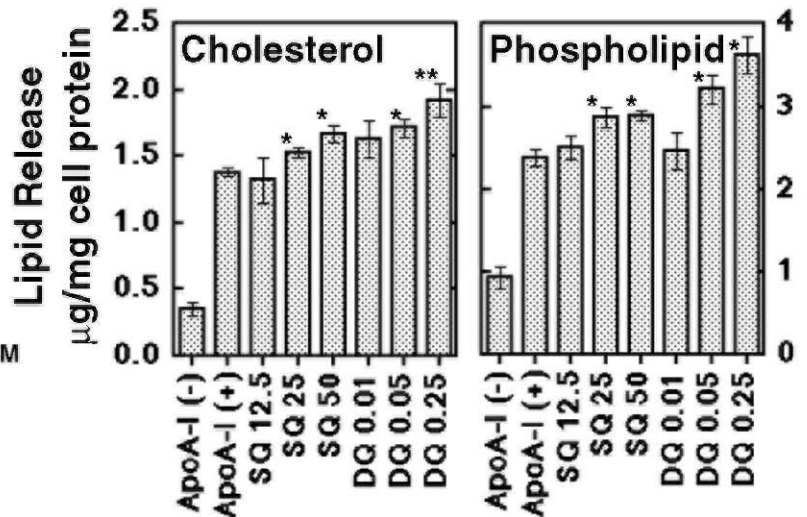

## B Balb/3T3

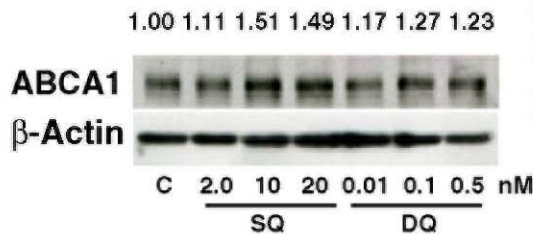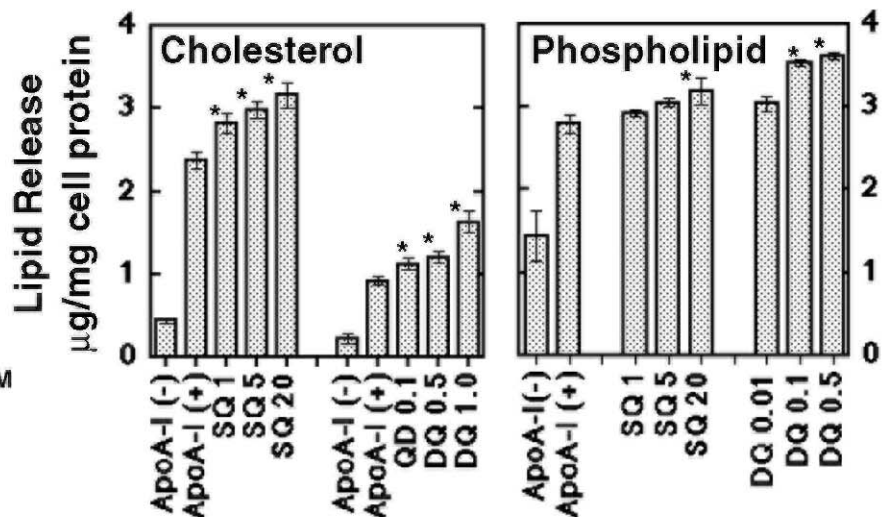

## C

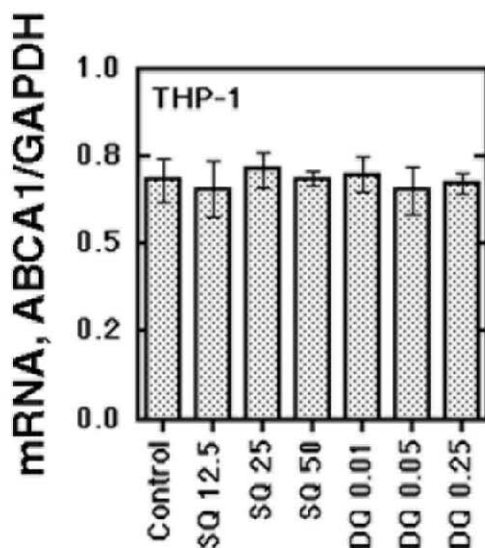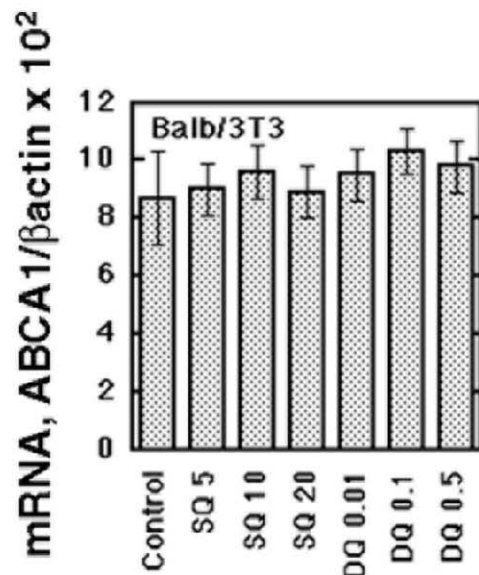

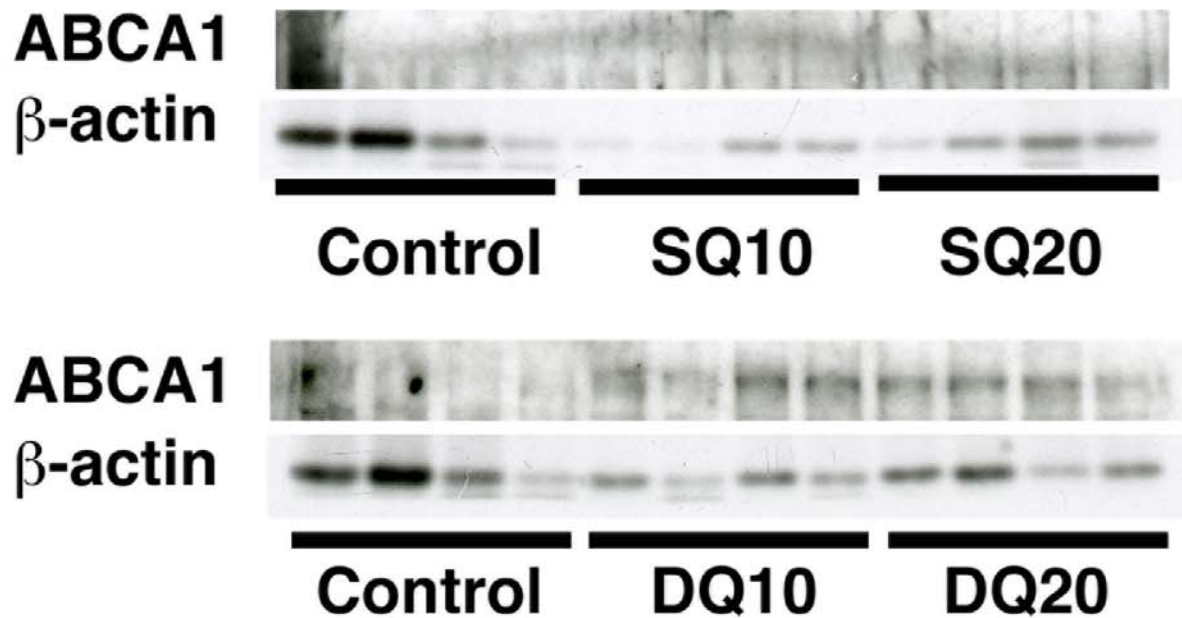

**Supplementary Figure II.** Western blotting data of ABCA1 expressed in the liver of the rabbits to which SQ or DQ was orally given as the indicated amounts in mg/kg/day. Data correspond to Figure 4A.

**Supplementary Figure III. A:** Body weight change of the rabbits during the experimental course. **B:** HPLC analysis of plasma lipoprotein at the day 3 and the day 7 of the experiment. The pooled plasma of each experimental group was analyzed.

**A**

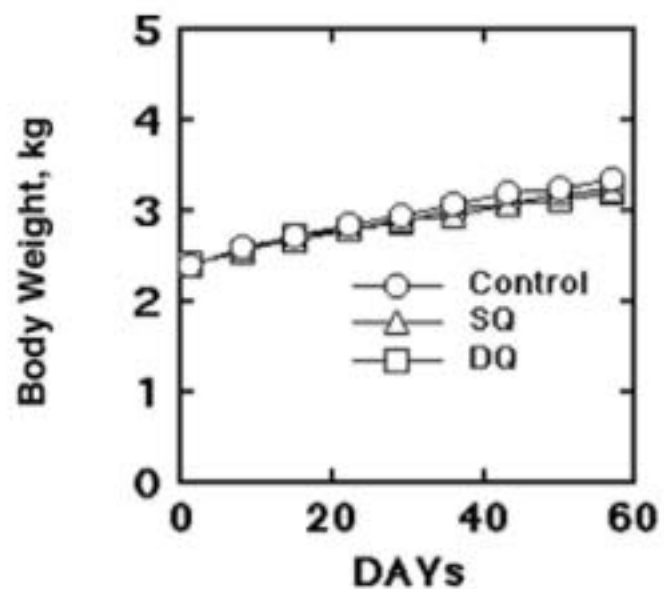

**B**

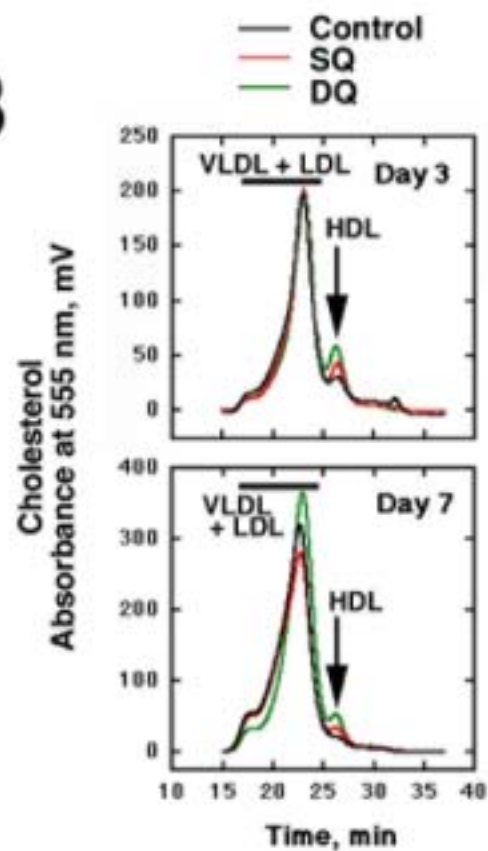

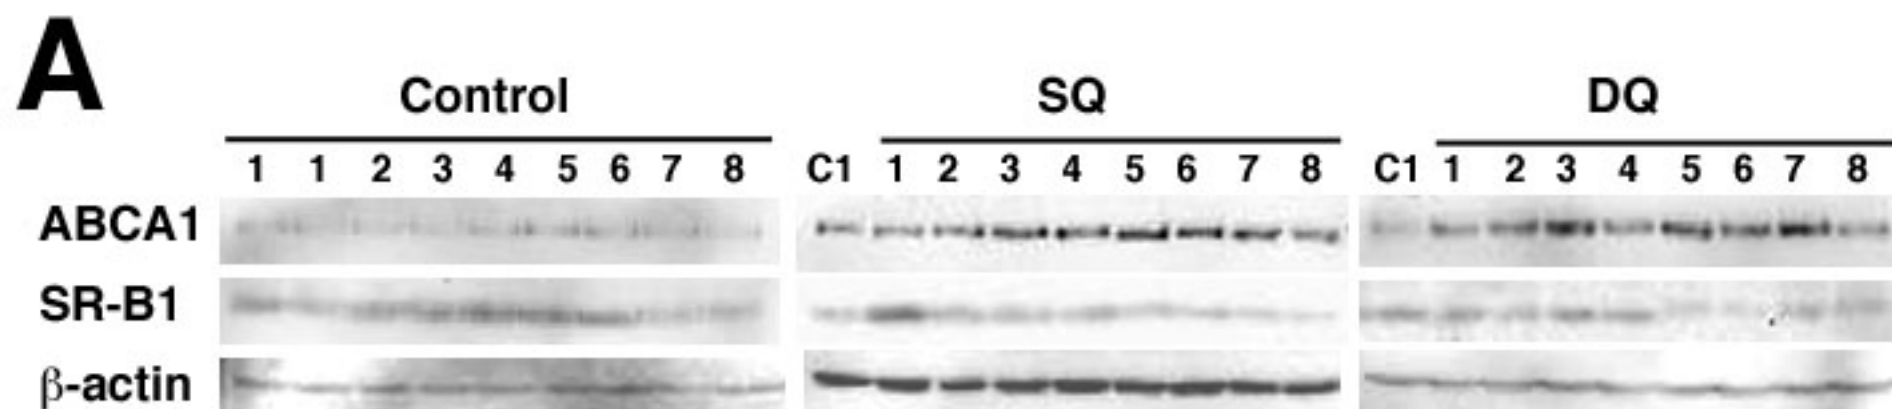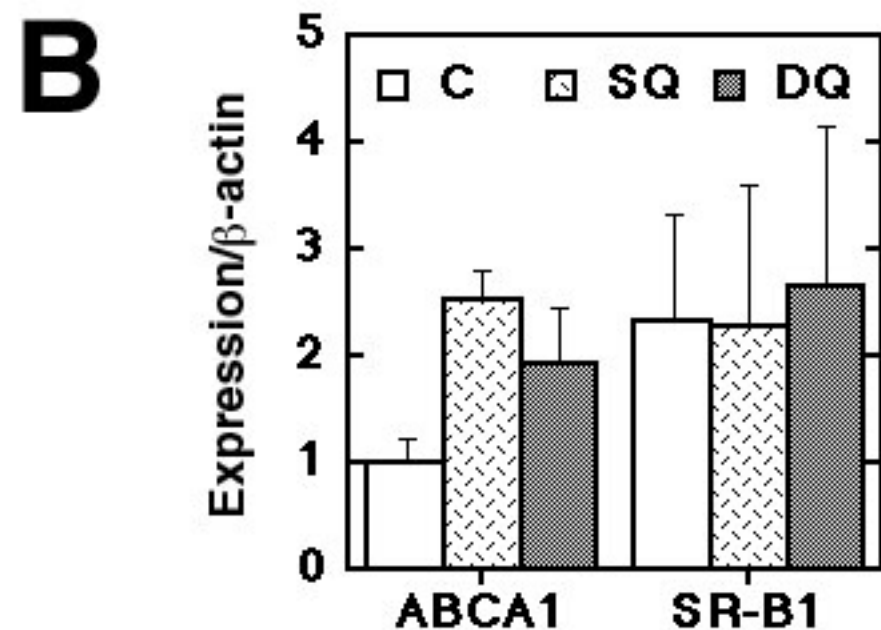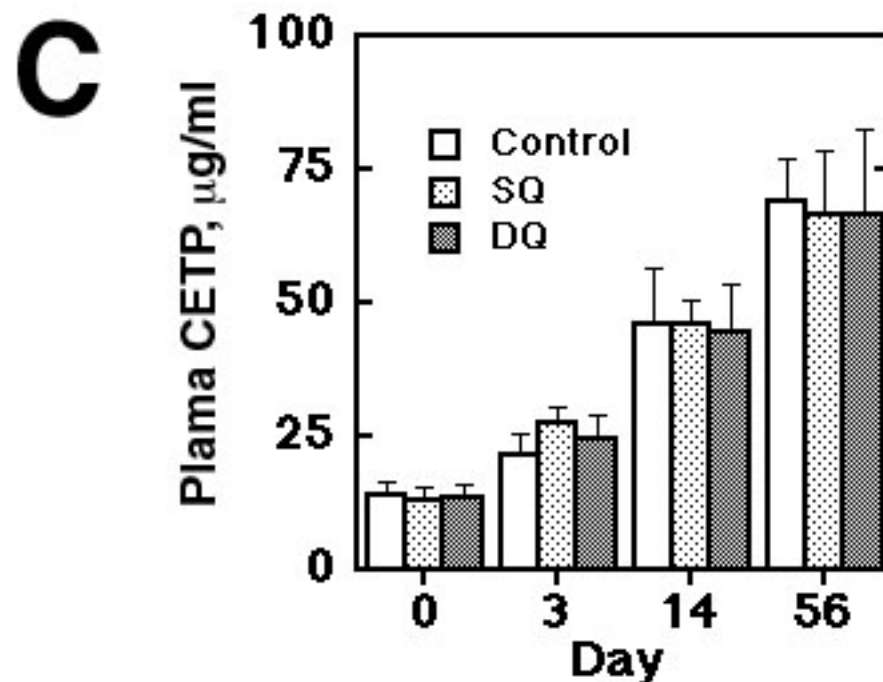

**Supplementary Figure IV.** Expression of ABCA1 and SR-B1 in the liver of the cholesterol-fed rabbits after 8 weeks. **A:** Proteins were analyzed by Western blotting by using respective specific antibody as described in the text in detail. SQ: spiroquinone; DQ: diphenquinone; C1: Control 1 for reference in each gel. **B:** Each band was digitally quantified and expressed as relative value to  $\beta$ -actin in the graph. **C:** Plasma CETP mass measured by immuno-sorbent assay. CETP mass increased from the day zero at each measurement ( $p < 0.01$ ) but showed no difference among the treatment groups.

## Control

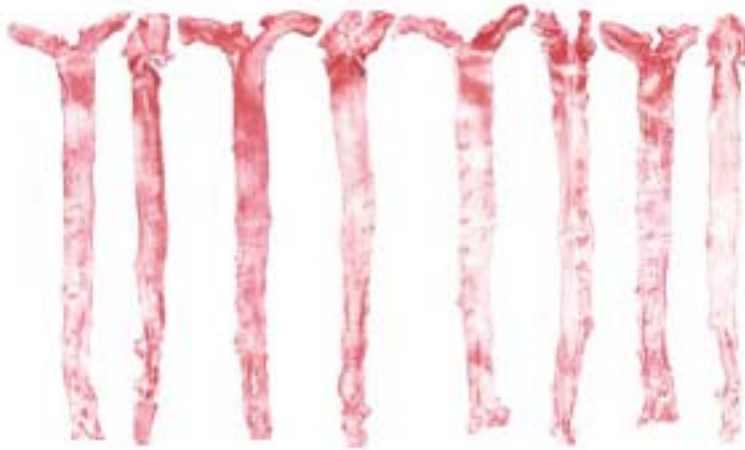

## Spiroquinone

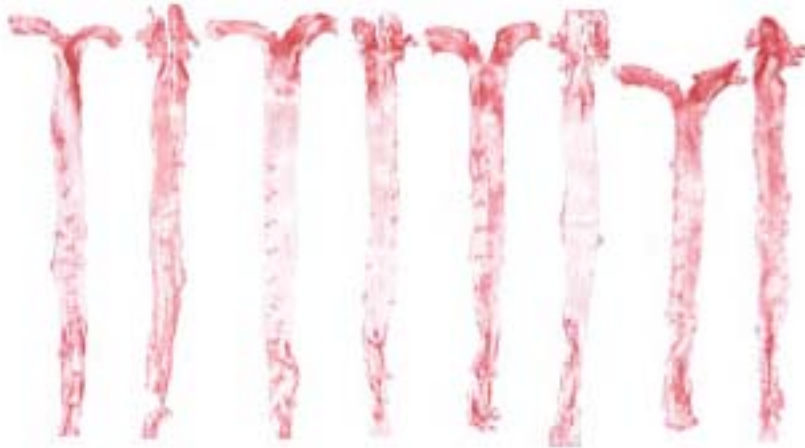

## Diphenoxinone

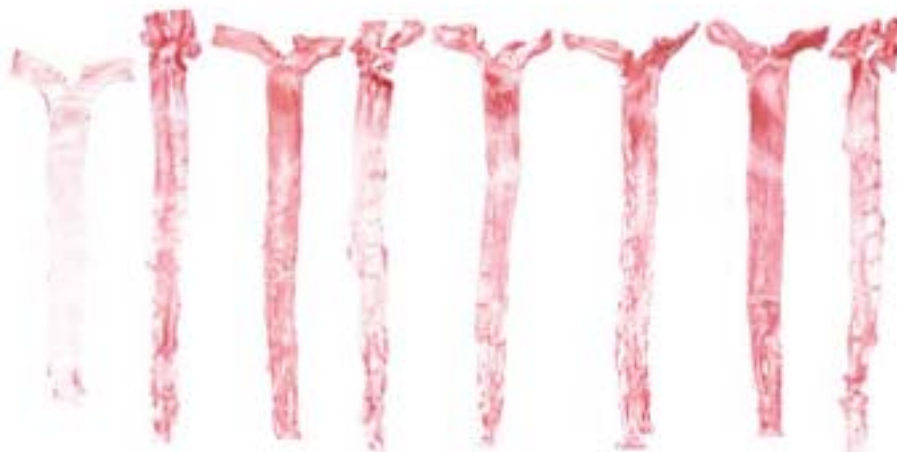

**Supplementary Figure V.** Vascular lipid deposit in cholesterol-fed rabbits in aortas including aortic arch. Lipid was stained with Oil-Red O. Detailed methods are described in the text.
